# Supplementary material for: Imaging Diagnostics Coupled with Non-Invasive and Micro-Invasive Analyses for the Restoration of Ethnographic Artifacts from French Polynesia
Source: MDPI journal article supplement (doi:10.3390/heritage5010012), 2022-01-17
Supplement: s1 [file s1]

# Imaging diagnostics coupled with non-invasive and micro-invasive analyses for the restoration of ethnographic artifacts from French Polynesia

Claudia Colantonio, Luca Lanteri, Alessandro Ciccola, Ilaria Serafini, Paolo Postorino, Erminia Censorii, Doinita Rotari, Claudia Pelosi\*

Corresponding author: pelosi@unitus.it

Table S1. Results of XRF analysis on selected points of tapa and headdress. The values in the table are the counts per second of each detected element, referred to the main signature of the spectrum.

| Points           | Photo                                                                               | Chemical elements (cps) |     |     |    |     |    |
|------------------|-------------------------------------------------------------------------------------|-------------------------|-----|-----|----|-----|----|
|                  |                                                                                     | Cl                      | K   | Ca  | Mn | Fe  | As |
| TAPA             |                                                                                     |                         |     |     |    |     |    |
| X1, black        |    | 59                      | 258 | 254 | -  | 156 | -  |
| X2, black        |   | 46                      | 131 | 260 | -  | 141 | -  |
| X3, red-brown    |  | 56                      | 240 | 205 | -  | 216 | -  |
| X4, brown        |  | 71                      | 244 | 201 | -  | 182 | -  |
| X5, light yellow |  | 50                      | 134 | 128 | -  | 100 | -  |
| X6, yellow       |  | 150                     | 493 | 604 | -  | 344 | -  |
| X7, fibers       |  | 165                     | 397 | 491 | -  | 335 | -  |
| X8, red          |  | 297                     | 680 | 746 | -  | 420 | -  |
| X9, fibers       |  | 812                     | 354 | 396 | -  | 313 | -  |
| X10, fibers      |  | 200                     | 99  | 123 | -  | 73  | -  |

| HEADDRESS     |                                                                                   |   |     |     |   |     |     |
|---------------|-----------------------------------------------------------------------------------|---|-----|-----|---|-----|-----|
| X1, brown     |  | - | -   | 131 | - | 751 | 253 |
| X2, white     |  | - | -   | 95  | - | 270 | -   |
| X3, fibers    |  | - | -   | 215 | - | -   | 200 |
| X4, red       |  | - | 172 | 62  | - | 183 | 568 |
| X5, lacuna    |  | - | -   | 73  | - | 132 | 231 |
| X6, back side |  | - | -   | 75  | - | 170 | 135 |

Table S2. FTIR band assignment of sample T3 from Tapa whose spectrum is shown in the Figure 10a.

| <b>Band position (cm<sup>-1</sup>)</b> | <b>Tentative assignment</b>                        |
|----------------------------------------|----------------------------------------------------|
| 3423                                   | OH stretching                                      |
| 2888                                   | C-H stretching                                     |
| 1612                                   | Intramolecular H <sub>2</sub> O in polysaccharides |
| 1423                                   | C-H and C-OH deformation                           |
| 1383                                   | C-H and C-OH deformation                           |
| 1100                                   | C-O stretching in polysaccharides                  |
| 673                                    | Skeletal vibration modes in polysaccharides        |
| 602                                    | Skeletal vibration modes in polysaccharides        |
| 497                                    | C1-O-C4 glucoside bond vibration                   |

Table S3. FTIR band assignment of sample P3 from headdress whose spectrum is shown in the Figure 10b.

| <b>Band position (cm<sup>-1</sup>)</b> | <b>Tentative assignment</b>                             |
|----------------------------------------|---------------------------------------------------------|
| 3298                                   | NH stretching of proteins                               |
| 2923, 2869                             | C-H stretching                                          |
| 1732                                   | C=O stretching of esters                                |
| 1659                                   | C=O stretching of proteins (amide I band)               |
| 1543                                   | NH <sub>2</sub> deformation of proteins (amide II band) |
| 1459                                   | C-H deformation of organics                             |
| 1375                                   | C-H deformation of organics                             |
| 1246                                   | C-O stretching of esters and proteins                   |
| 1168                                   | C-O stretching and C-H deformation                      |
| 1090                                   | C-O stretching in proteins                              |
| 1028                                   | C-O stretching in esters                                |
| 900                                    | C=C deformation and C-H vibration                       |
| 786                                    | C-H deformation                                         |
| 667                                    | C=C deformation                                         |
| 609                                    | -CH <sub>2</sub> deformation                            |
| 525                                    | Organics deformation mode                               |
| 468                                    | Organics deformation mode                               |

Table S4. Raman signature assignments for samples T5, T7 and T8 of tapa, and sample C2 of tiara.

| T5 bands (cm <sup>-1</sup> ) | Tentative assignment | T7 bands (cm <sup>-1</sup> ) | Tentative assignment                                     | T8 bands (cm <sup>-1</sup> ) | Tentative assignment               | C2 bands (cm <sup>-1</sup> ) | Tentative assignment |
|------------------------------|----------------------|------------------------------|----------------------------------------------------------|------------------------------|------------------------------------|------------------------------|----------------------|
|                              |                      |                              |                                                          |                              |                                    | 531                          | (Ellagic acid)       |
|                              |                      |                              |                                                          |                              |                                    | 561                          |                      |
|                              |                      |                              |                                                          |                              |                                    | 574                          | (Ellagic acid)       |
| 621                          |                      |                              |                                                          |                              |                                    | 620                          |                      |
| 633                          |                      |                              |                                                          |                              |                                    |                              |                      |
|                              |                      | 647                          |                                                          | 648                          |                                    |                              |                      |
| 653                          |                      | 653                          |                                                          |                              |                                    | 648                          | (Ellagic acid)       |
|                              |                      |                              |                                                          |                              |                                    | 667                          |                      |
|                              |                      | 694                          |                                                          | 691                          |                                    |                              |                      |
| 734                          |                      | 734                          |                                                          | 733                          |                                    | 733                          |                      |
| 791                          |                      |                              |                                                          |                              |                                    |                              |                      |
| 880                          |                      |                              |                                                          |                              |                                    |                              |                      |
| 960                          |                      | 959                          |                                                          | 959                          |                                    |                              |                      |
| 976                          |                      | 977                          |                                                          |                              |                                    |                              |                      |
| 1006                         |                      | 1004                         |                                                          | 1005                         |                                    |                              |                      |
| 1031                         |                      | 1033                         |                                                          |                              |                                    |                              |                      |
| 1052                         |                      | 1051                         |                                                          | 1050                         |                                    |                              |                      |
| 1073                         |                      | 1075                         |                                                          | 1077                         |                                    |                              |                      |
| 1144                         |                      |                              |                                                          | 1143                         |                                    |                              |                      |
|                              |                      | 1153                         | OCH <sub>3</sub> bending (Morinda)                       | 1158                         | OCH <sub>3</sub> bending (Morinda) |                              |                      |
|                              |                      | 1172                         |                                                          | 1178                         |                                    |                              |                      |
|                              |                      |                              |                                                          | 1202                         |                                    |                              |                      |
|                              |                      | 1225                         |                                                          |                              |                                    |                              |                      |
|                              |                      |                              |                                                          | 1241                         |                                    |                              |                      |
|                              |                      |                              |                                                          | 1251 (shoulder)              |                                    |                              |                      |
|                              |                      | 1263                         |                                                          |                              |                                    |                              |                      |
|                              |                      | 1287                         | C-OH (Cochineal) or C-OCH <sub>3</sub> bending (Morinda) |                              |                                    | 1285 (shoulder)              |                      |

|      |                                                                            |      |                                                                            |                 |                                                                            |      |                                                 |
|------|----------------------------------------------------------------------------|------|----------------------------------------------------------------------------|-----------------|----------------------------------------------------------------------------|------|-------------------------------------------------|
| 1329 | C-OH ( <b>Cochineal</b> ) or C-OCH <sub>3</sub> bending ( <b>Morinda</b> ) | 1332 | C-OH ( <b>Cochineal</b> ) or C-OCH <sub>3</sub> bending ( <b>Morinda</b> ) | 1334            | C-OH ( <b>Cochineal</b> ) or C-OCH <sub>3</sub> bending ( <b>Morinda</b> ) |      |                                                 |
|      |                                                                            |      |                                                                            |                 |                                                                            | 1343 |                                                 |
|      |                                                                            | 1363 |                                                                            |                 |                                                                            |      |                                                 |
| 1372 |                                                                            | 1373 |                                                                            |                 |                                                                            | 1371 | Aromatic C-C stretching ( <b>Ellagic acid</b> ) |
|      |                                                                            |      |                                                                            | 1384            |                                                                            |      |                                                 |
| 1396 | Aromatic C-C stretching, C-OH bending ( <b>Anthraquinones</b> )            |      |                                                                            |                 |                                                                            |      |                                                 |
|      |                                                                            | 1425 | Aromatic C-C stretching, C-OH bending ( <b>Anthraquinones</b> )            |                 |                                                                            |      |                                                 |
| 1438 |                                                                            |      |                                                                            | 1438 (shoulder) |                                                                            |      |                                                 |
|      |                                                                            | 1455 | Aromatic C-C stretching, C-OH bending ( <b>Anthraquinones</b> )            |                 |                                                                            |      |                                                 |
|      |                                                                            |      |                                                                            | 1467            | Aromatic C-C stretching, C-OH bending ( <b>Anthraquinones</b> )            |      |                                                 |
| 1481 |                                                                            |      |                                                                            |                 |                                                                            | 1484 | Aromatic C-C stretching ( <b>Ellagic acid</b> ) |
|      |                                                                            | 1496 |                                                                            |                 |                                                                            |      |                                                 |
|      |                                                                            | 1535 |                                                                            |                 |                                                                            |      |                                                 |
|      |                                                                            |      |                                                                            | 1553            | Aromatic C-C stretching ( <b>Anthraquinones</b> )                          |      |                                                 |
|      |                                                                            | 1569 |                                                                            |                 |                                                                            |      |                                                 |
| 1578 | Aromatic C-C stretching ( <b>Anthraquinones</b> )                          |      |                                                                            |                 |                                                                            |      |                                                 |
|      |                                                                            | 1591 |                                                                            | 1592            |                                                                            |      |                                                 |

|      |                                                   |      |                                                   |      |                                                   |      |                                                 |
|------|---------------------------------------------------|------|---------------------------------------------------|------|---------------------------------------------------|------|-------------------------------------------------|
| 1603 |                                                   |      |                                                   |      |                                                   | 1600 | Aromatic C-C stretching ( <b>Ellagic acid</b> ) |
| 1618 | Aromatic C-C stretching ( <b>Anthraquinones</b> ) | 1620 | Aromatic C-C stretching ( <b>Anthraquinones</b> ) | 1622 | Aromatic C-C stretching ( <b>Anthraquinones</b> ) | 1615 |                                                 |
|      |                                                   | 1647 |                                                   |      |                                                   |      |                                                 |
